# Supplementary material for: Cardanol based benzoxazine blends and bio-silica reinforced composites: thermal and dielectric properties
Source: Royal Society of Chemistry journal article supplement (doi:10.1039/c7nj04506a), 2018-01-01
Supplement: c7nj04506a1.pdf [file c7nj04506a1.pdf]

## SUPPORTING INFORMATION

### CARDANOL BASED BENZOXAZINE BLENDS AND BIO-SILICA REINFORCED COMPOSITES: THERMAL AND DIELECTRIC PROPERTIES

A. Hariharan, K. Srinivasan, C. Murthy and M. Alagar\*  
 Centre of Excellence for Advanced Materials, Manufacturing, Processing and  
 Characterization (CoExAMMPC), Vignan's University, Vadlamudi, Guntur 522 213, India  
 E-mail: [mkalagar@yahoo.com](mailto:mkalagar@yahoo.com) & [muthukaruppanalagar@gmail.com](mailto:muthukaruppanalagar@gmail.com).

**Table S1-** Nomenclature of Monomer, Polymer, Cross linker and Catalysts used

| Sample name                                                                                                                                        | Sample code                                                           |
|----------------------------------------------------------------------------------------------------------------------------------------------------|-----------------------------------------------------------------------|
| Bisphenol A aniline based benzoxazine (3,4-dihydro-6-(2-(3,4-dihydro-3-phenyl-2H-benzo[1,3]oxazin-6-yl)propan-2-yl)-3-phenyl-2H-benzo[1,3]oxazine) | Bz A                                                                  |
| Bisphenol F aniline based benzoxazine (bis(3,4-dihydro-3-phenyl-2H-benzo[1,3]oxazin-6-yl)methane)                                                  | Bz F                                                                  |
| 4, 4'-Bismaleimidodiphenyl methane                                                                                                                 | BMI-M                                                                 |
| 4, 4'-Bismaleimidodiphenyl sulfone                                                                                                                 | BMI-S                                                                 |
| Cardanol aniline based benzoxazine                                                                                                                 | CrAb                                                                  |
| Cardanol N,N-Dimethyl aminopropylamine based benzoxazine                                                                                           | CrDb                                                                  |
| Cardanol CPL modified N,N-Dimethyl aminopropylamine based benzoxazine                                                                              | CrCb                                                                  |
| Cardanol aniline based benzoxazine/ Bisphenol A aniline based benzoxazine/Bismaleimide-M                                                           | CrAb/Bz-A/BMI-M<br>100 / 100 / 25<br>100 / 100 / 50<br>100 / 100 / 75 |
| Cardanol aniline based benzoxazine/ Bisphenol A aniline based benzoxazine/Bismaleimide-S                                                           | CrAb/Bz-A/BMI-S<br>100 / 100 / 25<br>100 / 100 / 50<br>100 / 100 / 75 |
| Cardanol aniline based benzoxazine/ Bisphenol F aniline based benzoxazine/Bismaleimide-M                                                           | CrAb/Bz-F/BMI-M<br>100 / 100 / 25<br>100 / 100 / 50<br>100 / 100 / 75 |
| Cardanol aniline based benzoxazine/ Bisphenol F aniline based benzoxazine/Bismaleimide-S                                                           | CrAb/Bz-F/BMI-S<br>100 / 100 / 25<br>100 / 100 / 50<br>100 / 100 / 75 |

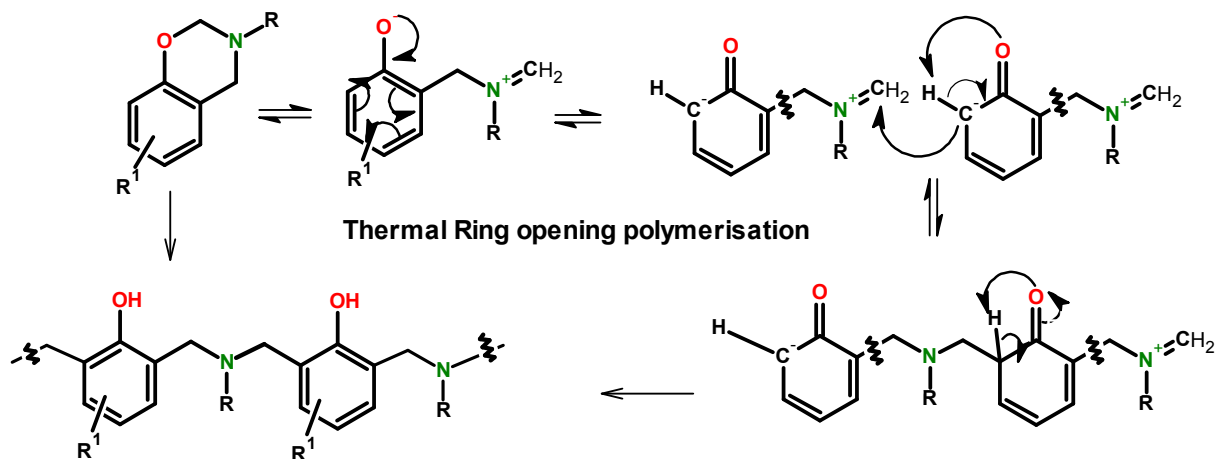

**Scheme S1.** Mechanism of Thermal Curing Behaviour of Benzoxazine.

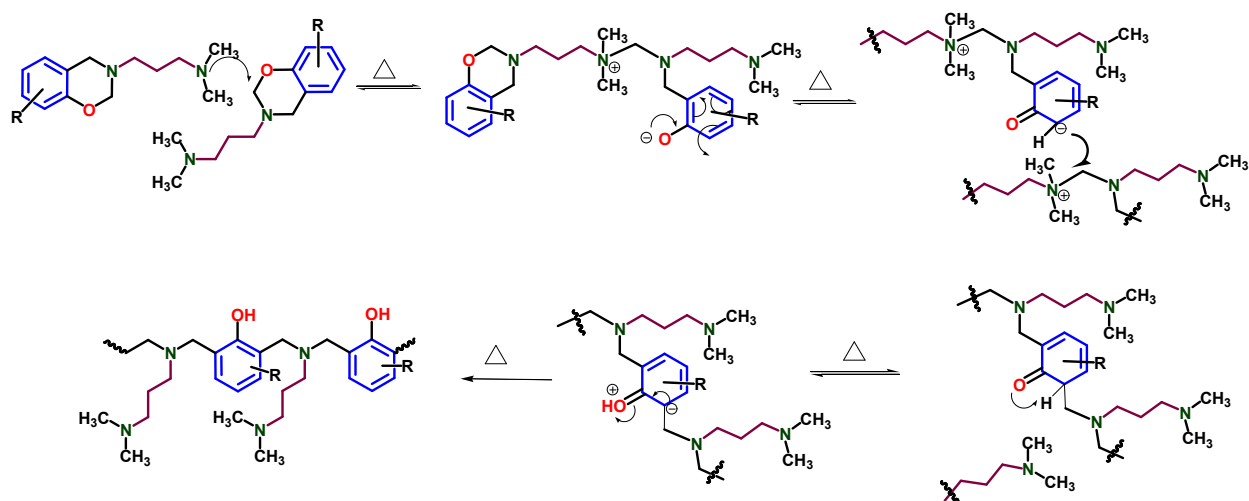

**Scheme S2.** Mechanism of Tertiary (Dimethyl) Amine Based Polybenzoxazine Derivative.

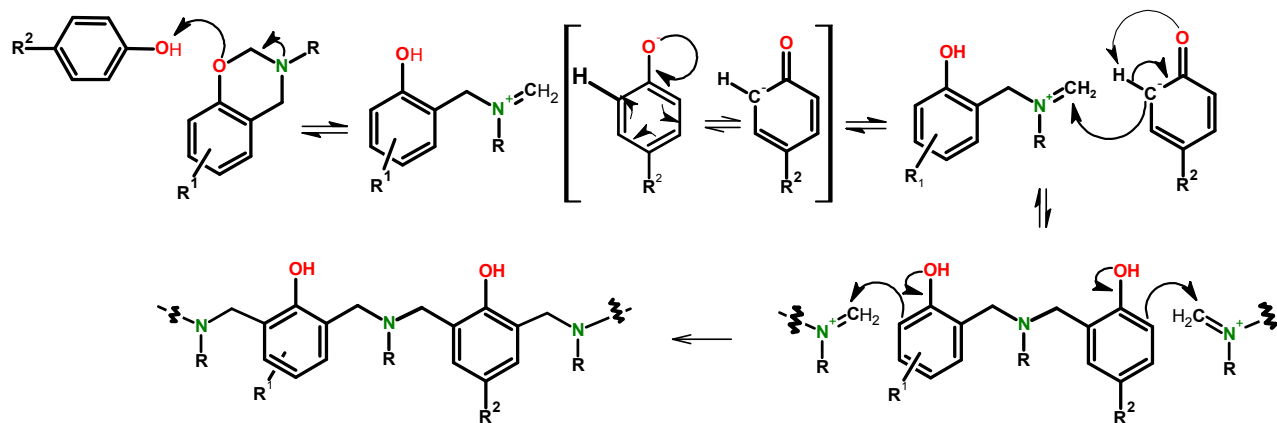

**Scheme S3.** Mechanism of Phenolic Catalyst on Curing Behavior of Benzoxazine.

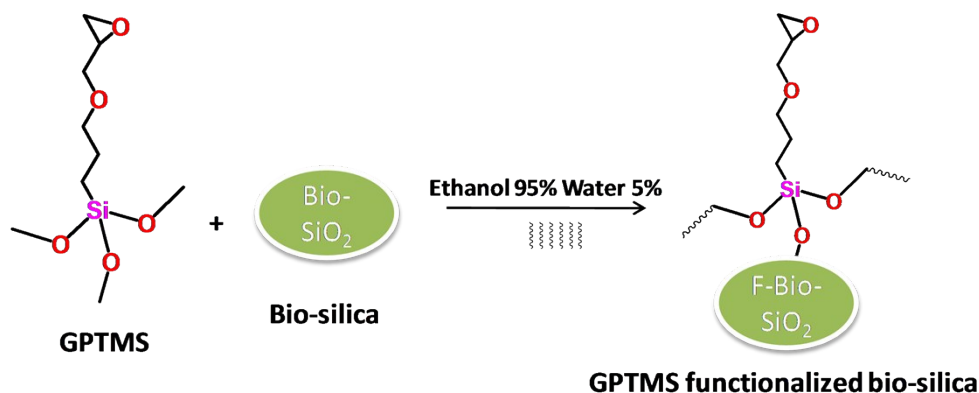

**Scheme S4** GPTMS surface Functionalization on Biosilica.

## MECHANISM

The cationic ring-opening polymerization mechanism proposed in Scheme S1 has been widely accepted by most researchers. A recent report has demonstrated a competitive pathway through phenoxy structures that finally converted into the phenolic polymers upon heating. Self-catalyzing N, N-dimethyl amino substituted group inbuilt benzoxazine based ring opening mechanism is explained in Scheme S2. The mechanism involves a quaternary ammonium intermediate i.e zwitterionic intermediate, which further produces another intermediate and the product was formed through proton transfer.

Benzoxazine monomer was cured with catalysts such as phenolic compounds, and its mechanism is described as a ring-opening addition reaction mechanism and is presented in

Scheme S3. The reactivity of CrAb/Bzs/BMIs with the different phenolic compounds such as 4-hydroxyacetophenone, 4-aminophenol, 4-hydroxyphenylmaleimide were studied and these catalysts stabilize the conjugate base of the benzoxazine during curing. The phenolic catalyst has possesses an electron withdrawing group and this group increases the acidity and thus induces the ring opening of benzoxazine at a lower temperature.

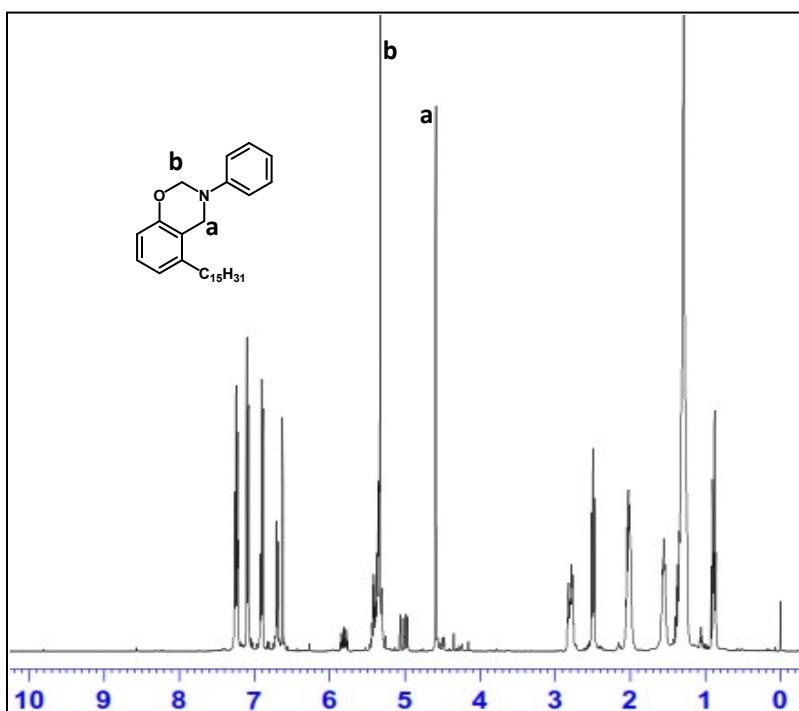

**Figure -S1. <sup>1</sup>H NMR Spectra of CrAb Benzoxazine**

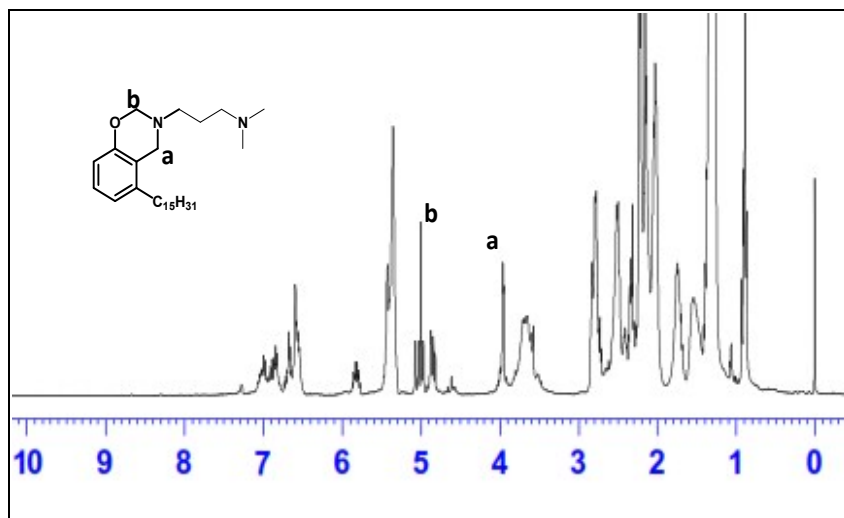

Figure -S2. <sup>1</sup>H NMR Spectra of CrDb Benzoxazine

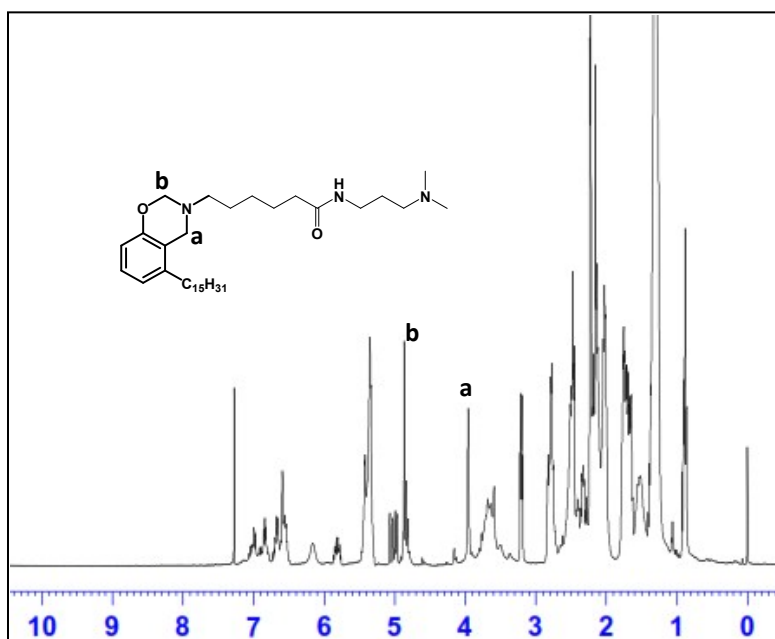

Figure -S3. <sup>1</sup>H NMR Spectra of CrCb Benzoxazine.

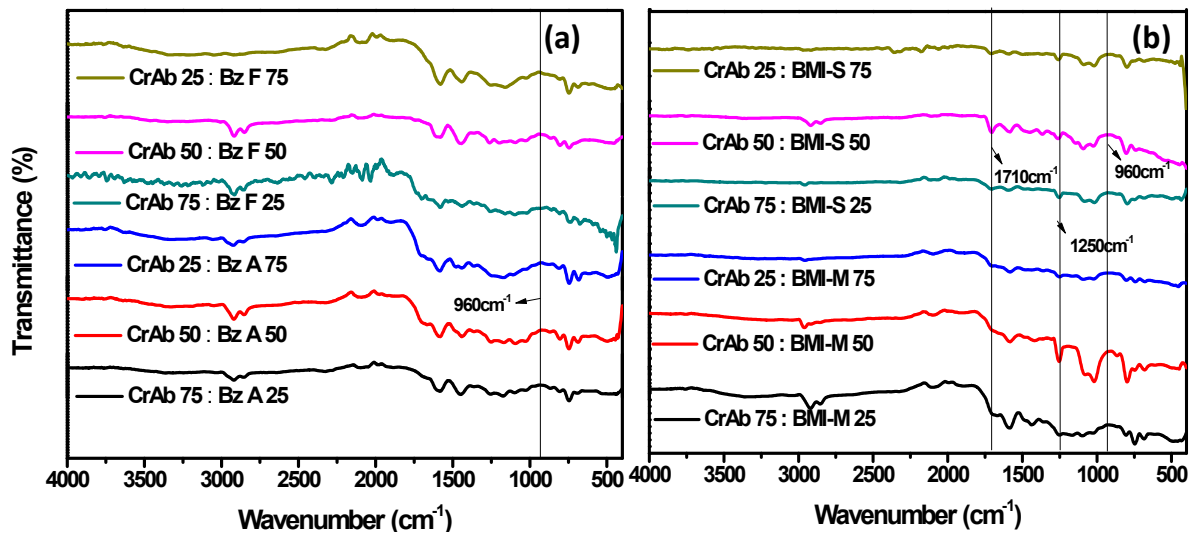

Figure S4. FT-IR spectrum of polybenzoxazine of (a) CrAb/Bzs and (b)CrAb/BMIs .

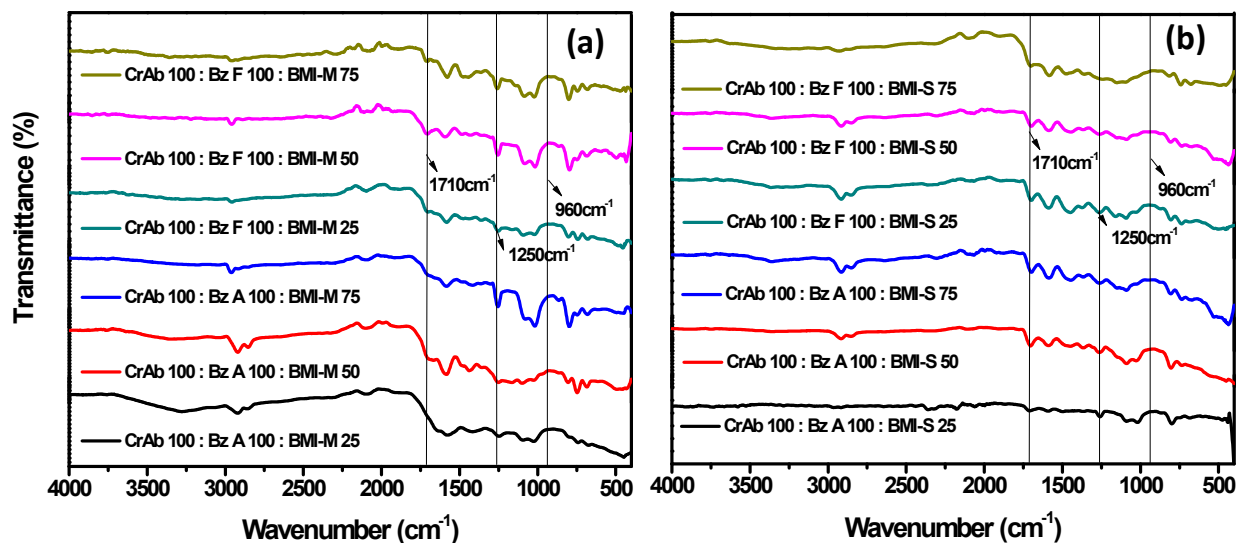

Figure S5. FT-IR spectrum of polybenzoxazine of (a) CrAb/Bzs/BMI-M and (b)CrAb/Bzs/BMI-S .

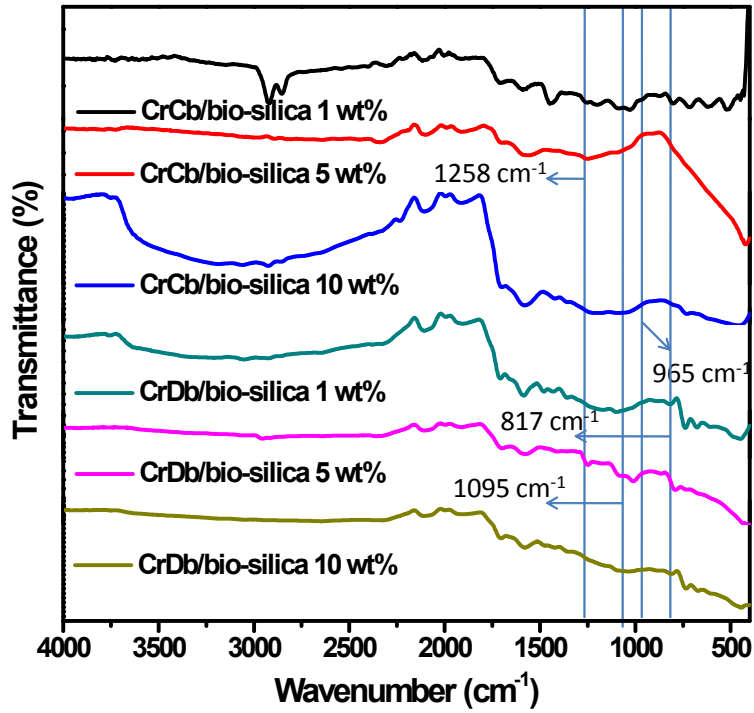

**Figure S6.** FT-IR spectrum of bio-silica reinforced cardanol based polybenzoxazine

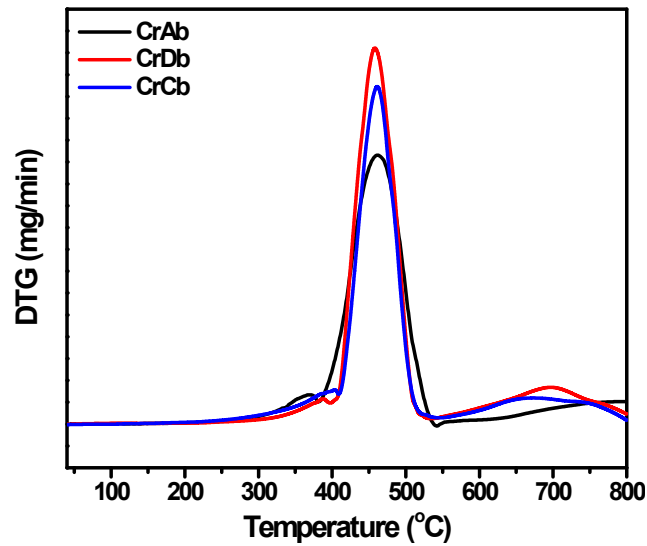

**Figure S7.** DTG Thermogram of Polybenzoxazine of CrAb, CrDb and CrCb.

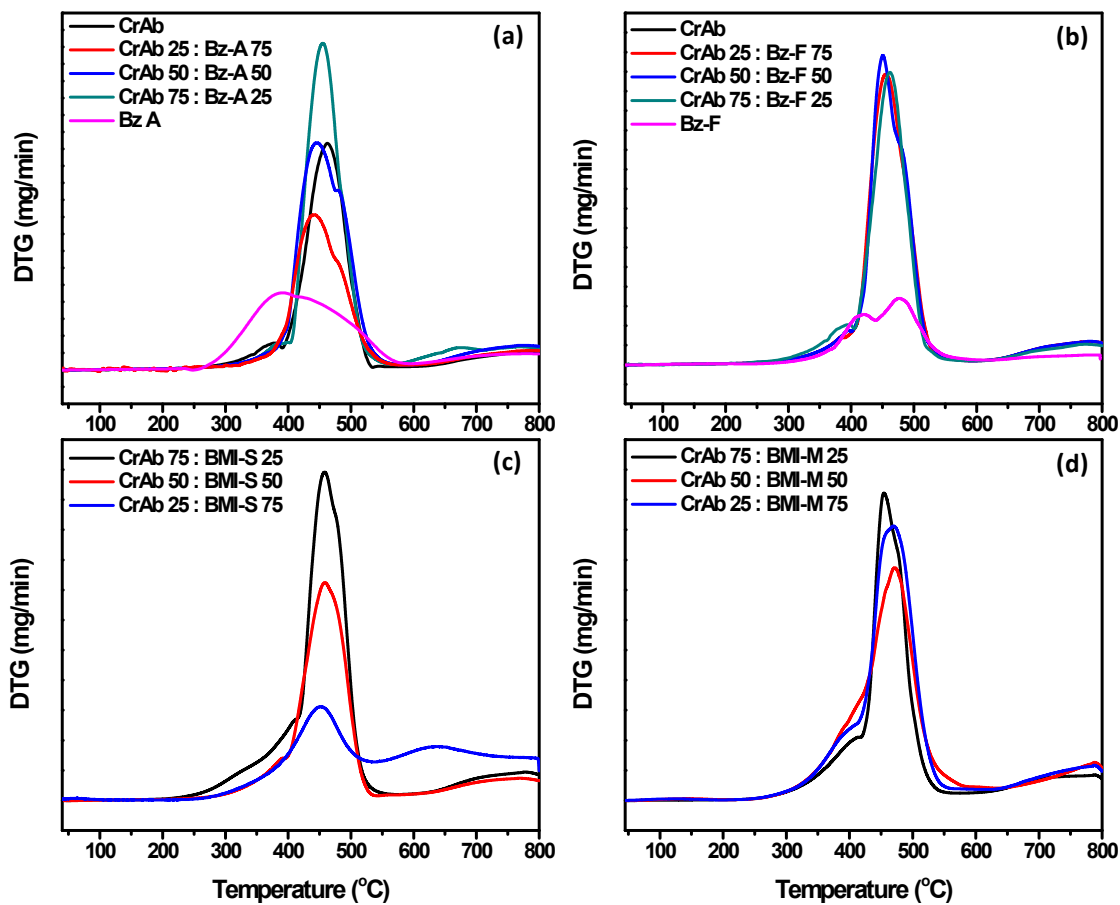

**Figure S8.** DTG thermogram of copolymer of (a) CrAb/Bz-A (b) CrAb/Bz-F; (c) CrAb/BMI-S; (d) CrAb/BMI-M.



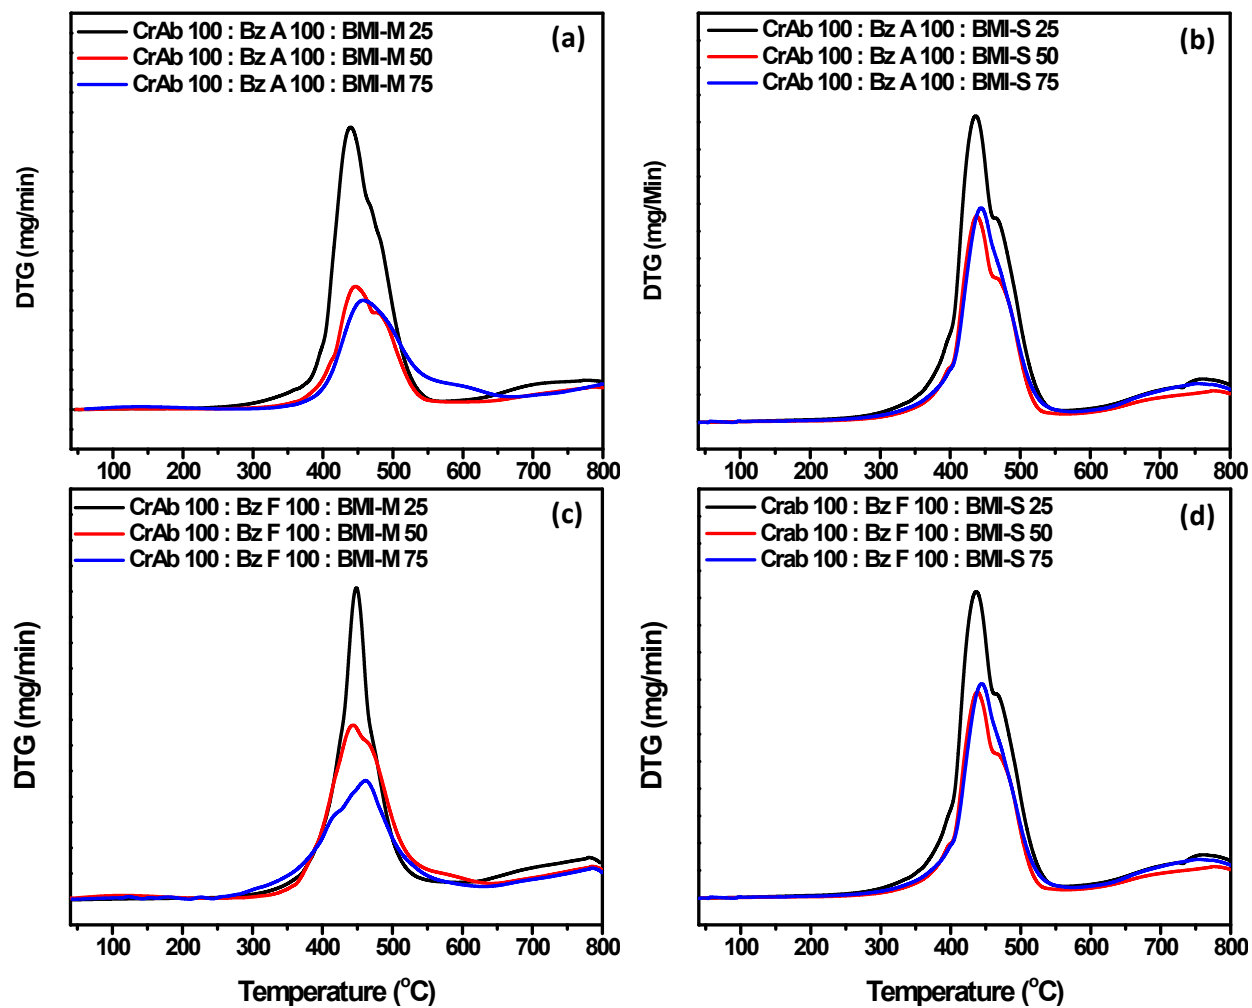

**Figure S9.** DTG thermogram of a copolymer of (a) CrAb/Bz-A/BMI-M; (b) CrAb/Bz-A/BMI-S. (c) CrAb/Bz-F/BMI-M; (d) CrAb/Bz-F/BMI-S.

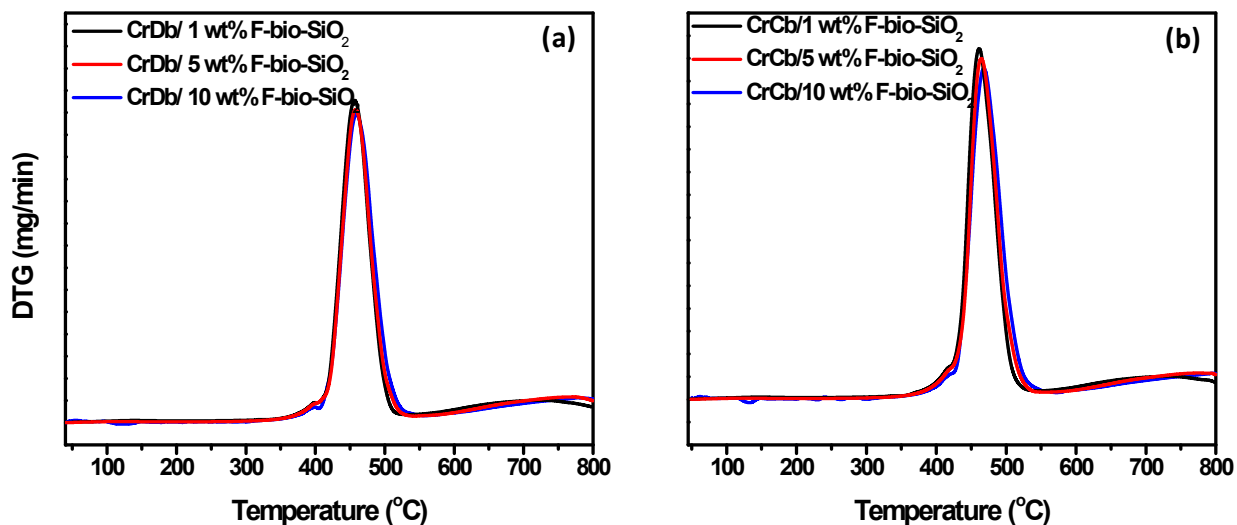

**Figure S10.** DTG thermogram of poly CrDb or CrCb/composites; (a) DTG thermogram of CrDb/F-bio-silica; (b) DTG thermogram of CrCb/F-bio-silica.

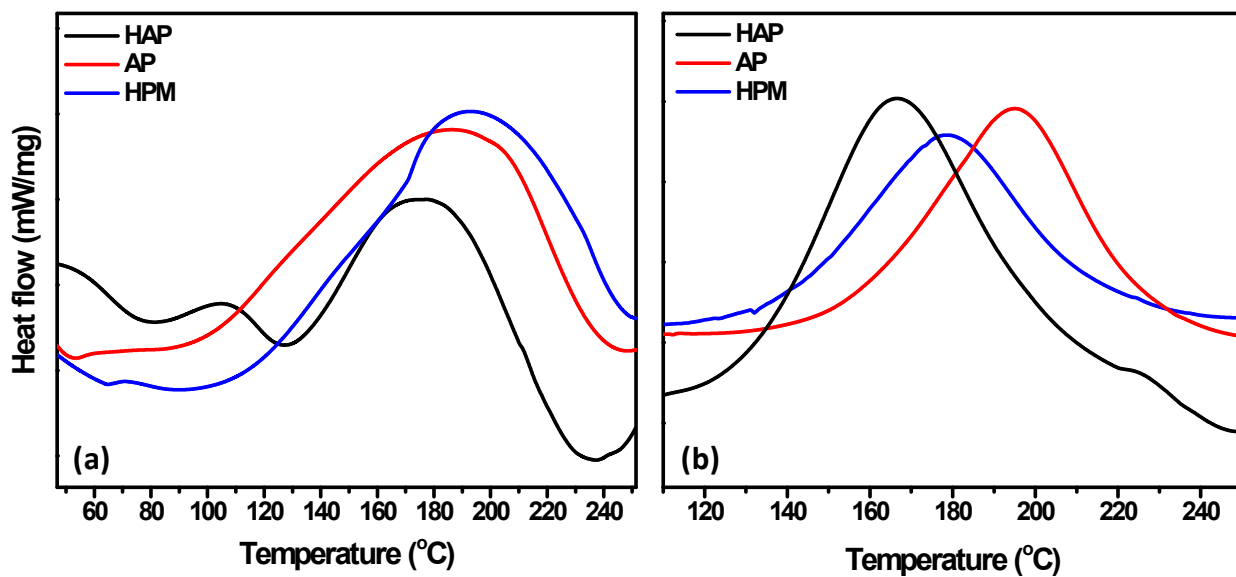

**Figure S11.** DSC thermogram of catalytic curing behavior of (a) CrAb/Bz-A/BMI-S, and (b) CrAb/Bz-F/BMI-S ternary blends.

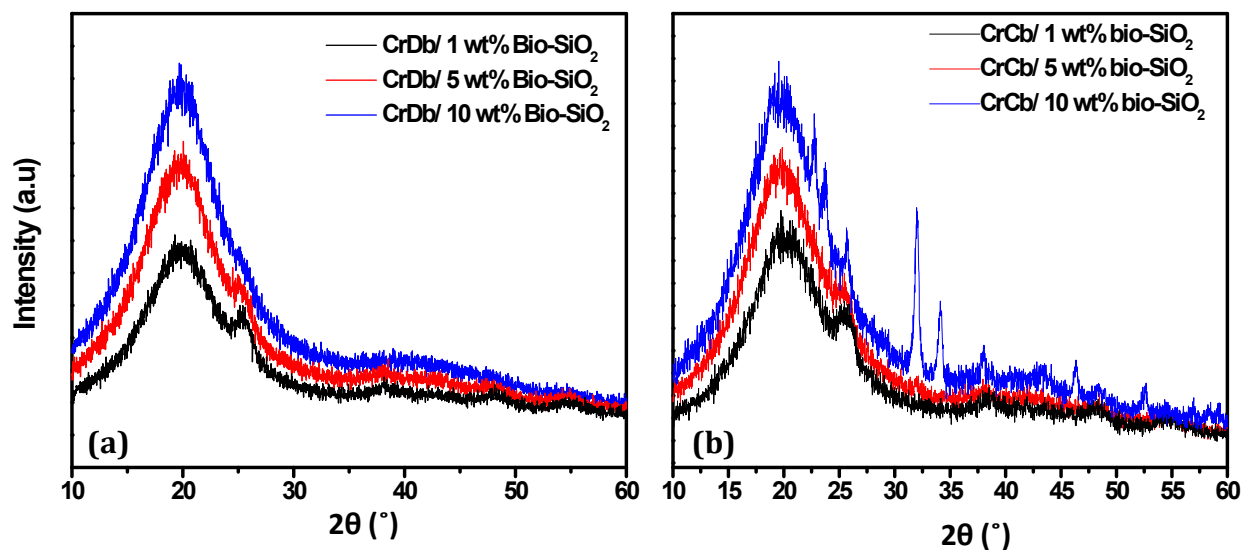

**Figure S12.** XRD spectrum of bio-silica reinforced cardanol based polybenzoxazine; (a) bio-silica incorporated CrDb polymer and (b) bio-silica incorporated CrCb polymer.

**Table S2.** Catalytic curing Behavior of CrAb/Bz-A/BMI-S and CrAb/Bz-F/BMI-S Ternary Blends.

| 10 wt% Catalyst with ternary blends | Curing behaviour of CrAb/Bz-A/ BMI-S Ternary blend |                     |                     |            | Curing behaviour of CrAb/Bz-F/ BMI-S Ternary blend |                     |                     |            |
|-------------------------------------|----------------------------------------------------|---------------------|---------------------|------------|----------------------------------------------------|---------------------|---------------------|------------|
|                                     | T <sub>i</sub> (°C)                                | T <sub>p</sub> (°C) | T <sub>f</sub> (°C) | ΔH (mJ/mg) | T <sub>i</sub> (°C)                                | T <sub>p</sub> (°C) | T <sub>f</sub> (°C) | ΔH (mJ/mg) |
| 4-Hydroxy phenylmaleimide (HPM)     | 94                                                 | 192                 | 249                 | 216        | 136                                                | 195                 | 241                 | 197        |
| 4-Aminophenol (AP)                  | 89                                                 | 187                 | 245                 | 183        | 125                                                | 178                 | 233                 | 179        |
| 4-Hydroxyacetophenon (HAP)          | 84                                                 | 173                 | 236                 | 156        | 116                                                | 168                 | 221                 | 193        |
